# Supplementary material for: Telemedical support for prehospital Emergency Medical Service (TEMS trial): study protocol for a randomized controlled trial
Source: Springer Nature journal article supplement (doi:10.1186/s13063-017-1781-2), 2017-01-26
Supplement: MOESM2 [file 12021500]

|                                                                                                                                                                                                                                                                                                                                                                                                                                                                                                                                                                                                                                                                                                                                          |   |  |  |   |   |  |  |  |
|------------------------------------------------------------------------------------------------------------------------------------------------------------------------------------------------------------------------------------------------------------------------------------------------------------------------------------------------------------------------------------------------------------------------------------------------------------------------------------------------------------------------------------------------------------------------------------------------------------------------------------------------------------------------------------------------------------------------------------------|---|--|--|---|---|--|--|--|
| <ul style="list-style-type: none"> <li><i>personal injury</i></li> <li>• <i>Explosion-, thermic or chemical accidents with reference to personal severe injury</i></li> <li>• <i>High-voltage electrical accident</i> <ul style="list-style-type: none"> <li>• <i>Water connected accidents (drowning-, diving accident, fall through ice)</i></li> </ul> </li> <li>• <i>Accidents involving hazardous goods</i> <ul style="list-style-type: none"> <li>• <i>Hostage-taking, rampage or other crimes with potential danger for human life (preventive deployment, police consultation)</i></li> </ul> </li> <li>• <i>Immediate threatening suicide</i></li> <li>• <i>Immediate forthcoming delivery or preceding delivery</i></li> </ul> |   |  |  |   |   |  |  |  |
| <p><b>Primary outcome variables</b></p> <ul style="list-style-type: none"> <li>• <i>Immediate allergic reaction</i></li> <li>• <i>Intervention-related and immediate treatment-requiring blood pressure drop on scene</i></li> <li>• <i>Immediate intervention-related apnea or respiratory insufficiency on scene</i></li> </ul>                                                                                                                                                                                                                                                                                                                                                                                                        | X |  |  | X |   |  |  |  |
| <ul style="list-style-type: none"> <li>• <i>Intervention-related circulatory arrest within 24h of EMS treatment</i></li> </ul>                                                                                                                                                                                                                                                                                                                                                                                                                                                                                                                                                                                                           | X |  |  | X | X |  |  |  |
| <p><b>Secondary outcome variables</b></p> <ul style="list-style-type: none"> <li>• <i>Quality of medical history survey</i></li> <li>• <i>Treatment quality</i> <ul style="list-style-type: none"> <li>• <i>Quality of documentation</i></li> </ul> </li> <li>• <i>Duration of the physician engagement-time.</i></li> <li>• <i>Fulfillment of predefined quality indicators for "Tracer" diagnoses (trauma, stroke, acute coronary syndrome, pain</i></li> </ul>                                                                                                                                                                                                                                                                        | X |  |  | X |   |  |  |  |

|                                                                                                                                                                                                                                                                                                                                                                                                                                                                                                                                                                                                                                                                                                                                    |   |  |  |                                                                                      |  |  |  |
|------------------------------------------------------------------------------------------------------------------------------------------------------------------------------------------------------------------------------------------------------------------------------------------------------------------------------------------------------------------------------------------------------------------------------------------------------------------------------------------------------------------------------------------------------------------------------------------------------------------------------------------------------------------------------------------------------------------------------------|---|--|--|--------------------------------------------------------------------------------------|--|--|--|
| <p>control, bronchial asthma, chronic obstructive pulmonary disease, seizure, sepsis, hypoglycemia)</p> <ul style="list-style-type: none"> <li>• Correct pre-hospital diagnosis</li> <li>• Other adverse events</li> <li>• Premature termination of the telemedical or conventional EMS operation, as unnecessary</li> <li>• Required conversion from the primary dispatched tele-EMS physician to a conventional EMS physician <ul style="list-style-type: none"> <li>• Assessment if a conventional EMS physician operation could have been handled by a tele-EMS physician</li> </ul> </li> </ul>                                                                                                                               |   |  |  |                                                                                      |  |  |  |
| <p><b>Other Outcome Measures</b></p> <ul style="list-style-type: none"> <li>• Time point of the first contact with a physician, time span between the emergency call and hospital arrival</li> <li>• Seven-step National Advisory Committee for Aeronautics severity score <ul style="list-style-type: none"> <li>• Proportion of conventional emergency cases, which were passed to a tele-EMS physician</li> </ul> </li> <li>• Necessity of an EMS physician at all</li> <li>• Technical performance <ul style="list-style-type: none"> <li>• Frequency of tele-EMS contacting by a conventional EMS physician</li> <li>• Level of medical education/ experience of the involved physicians in each group</li> </ul> </li> </ul> | X |  |  | X                                                                                    |  |  |  |
| <ul style="list-style-type: none"> <li>• Survey of the patients satisfaction with the</li> </ul>                                                                                                                                                                                                                                                                                                                                                                                                                                                                                                                                                                                                                                   | X |  |  |  |  |  |  |

|                                                                                                                                                                                                                                                                                                  |   |  |  |         |   |   |   |   |
|--------------------------------------------------------------------------------------------------------------------------------------------------------------------------------------------------------------------------------------------------------------------------------------------------|---|--|--|---------|---|---|---|---|
| <i>used EMS system</i>                                                                                                                                                                                                                                                                           |   |  |  |         |   |   |   |   |
| • <i>Death within 24 hours and until day 30 of hospitalization respectively until discharge from hospital</i>                                                                                                                                                                                    | X |  |  | ◄—————► |   |   |   |   |
| • <i>Discharge destination from hospital</i><br>• <i>Intensive Care Unit (ICU) and hospital length of stay</i>                                                                                                                                                                                   | X |  |  |         | X |   |   |   |
| • <i>Death within 30 and 90 days after EMS treatment</i><br>• <i>Retrospective analysis of the same t<sub>1</sub>- t<sub>3</sub> data for the excluded (non-randomized) conventional EMS physician cases (collected from the conventional EMS physician protocols and the hospital database)</i> | X |  |  |         |   | X | X |   |
| <i>Survey of the paramedics, the EMS physicians and the emergency room personnel in regard to their satisfaction with the tele-EMS system (once/ twice during the study period)</i>                                                                                                              |   |  |  |         |   |   |   | X |

\* Specific phases: Run-In phase (1.5-2 months prior study start), A = Enrolment, B = Allocation, C = During EMS intervention, D = Early follow up, E = Late follow up, F = Additional analysis

\*\*Specific timepoints: -t<sub>2</sub> = Run-In phase (1.5-2 months prior study start), -t<sub>1</sub> = Enrolment during the emergency call in the dispatching center, 0 = Allocation via automatic randomization by the dispatching software, t<sub>1</sub> = EMS operation on scene, t<sub>2</sub> = 24 hours after EMS intervention, t<sub>3</sub> = Discharge from hospital, t<sub>4</sub> = Follow-up 30 days after EMS intervention, t<sub>5</sub> = Follow up 90 days after EMS intervention, t<sub>x</sub> = Parallel to the main study.
